# Supplementary material for: Direct observations of energy transfer from resonant electrons to whistler-mode waves in magnetosheath of Earth
Source: PubMed Central journal article supplement (PMC9616889; doi:10.1038/s41467-022-33604-2), 2022-10-28
Supplement: 41467_2022_33604_MOESM1_ESM.pdf [file 41467_2022_33604_MOESM1_ESM.pdf]

Supplementary Information for  
**Direct observations of energy transfer from resonant electrons to  
whistler-mode waves in magnetosheath of Earth**

N. Kitamura<sup>1,2</sup>, T. Amano<sup>2</sup>, Y. Omura<sup>3</sup>, S. A. Boardsen<sup>4,5</sup>, D. J. Gershman<sup>4</sup>, Y. Miyoshi<sup>1</sup>,  
M. Kitahara<sup>6</sup>, Y. Katoh<sup>6</sup>, H. Kojima<sup>3</sup>, S. Nakamura<sup>1</sup>, M. Shoji<sup>1</sup>, Y. Saito<sup>7</sup>, S. Yokota<sup>8</sup>,  
B. L. Giles<sup>4</sup>, W. R. Paterson<sup>4</sup>, C. J. Pollock<sup>9</sup>, A. C. Barrie<sup>4,10</sup>, D. G. Skeberdis<sup>4,11</sup>,  
S. Kreisler<sup>4,10</sup>, O. Le Contel<sup>12</sup>, C. T. Russell<sup>13</sup>, R. J. Strangeway<sup>13</sup>, P.-A. Lindqvist<sup>14</sup>,  
R. E. Ergun<sup>15</sup>, R. B. Torbert<sup>16,17</sup>, and J. L. Burch<sup>17</sup>

- 1, Institute for Space-Earth Environmental Research, Nagoya University, Nagoya, Japan.
  - 2, Department of Earth and Planetary Science, Graduate School of Science, the University of Tokyo, Tokyo, Japan.
  - 3, Research Institute for Sustainable Humanosphere, Kyoto University, Uji, Japan.
  - 4, NASA Goddard Space Flight Center, Greenbelt, Maryland, USA.
  - 5, Goddard Planetary Heliophysics Institute, University of Maryland in Baltimore, Maryland, USA.
  - 6, Department of Geophysics, Graduate school of Science, Tohoku University, Sendai, Japan.
  - 7, Institute of Space and Astronautical Science, Japan Aerospace Exploration Agency, Sagami-hara, Japan.
  - 8, Department of Earth and Space Science, Graduate School of Science, Osaka University, Toyonaka, Japan.
  - 9, Denali Scientific, Fairbanks, Alaska, USA.
  - 10, Aurora Engineering, Potomac, Maryland, USA.
  - 11, a.i. solutions Inc., Lanham, Maryland, USA.
  - 12, Laboratoire de Physique des Plasmas, CNRS/Sorbonne Université/Université Paris-Saclay/Observatoire de Paris/Ecole Polytechnique Institut Polytechnique de Paris, Paris, France.
  - 13, Department of Earth, Planetary, and Space Science, University of California, Los Angeles, California, USA.
  - 14, Royal Institute of Technology, Stockholm, Sweden.
  - 15, Laboratory for Atmospheric and Space Physics, University of Colorado, Boulder, Colorado, USA.
  - 16, Department of Physics, University of New Hampshire, Durham, New Hampshire, USA.
  - 17, Southwest Research Institute, San Antonio, Texas, USA.
- Corresponding author: Naritoshi Kitamura ([kitamura@isee.nagoya-u.ac.jp](mailto:kitamura@isee.nagoya-u.ac.jp))

Supplementary Information includes:  
Supplementary Figs. 1–9

## MMS Formation

2016-12-25/15:59:19.64 UT

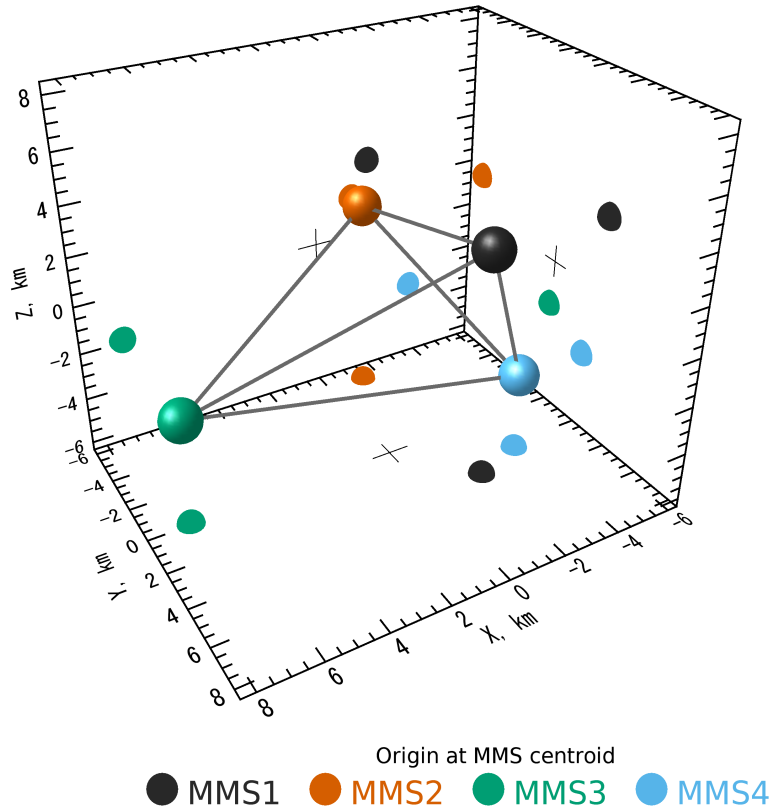

**Supplementary Fig. 1 | Formation of MMS spacecraft in the field-aligned coordinate system.** MMS1 and MMS4 are the closest pair in the direction perpendicular to the background magnetic field ( $\mathbf{B}_0$ ). The distance perpendicular to  $\mathbf{B}_0$  (about 2 km) was comparable to the gyro-radius (about 1.43 km) of the strongly nongyrotropic electrons (Background magnetic field intensity: 33.1 nT, Energy: about 500 eV, Pitch angle: about  $141^\circ$ ). The distance along  $\mathbf{B}_0$  was about 6 km, which was about 2.5 times smaller than the wavelength of the whistler-mode wave (about 15 km). Even the maximum separation (about 11 km) was much smaller than the gyro-radius of ions (about 116 km) with energy of 700 eV (ion temperature perpendicular to  $\mathbf{B}_0$ ).

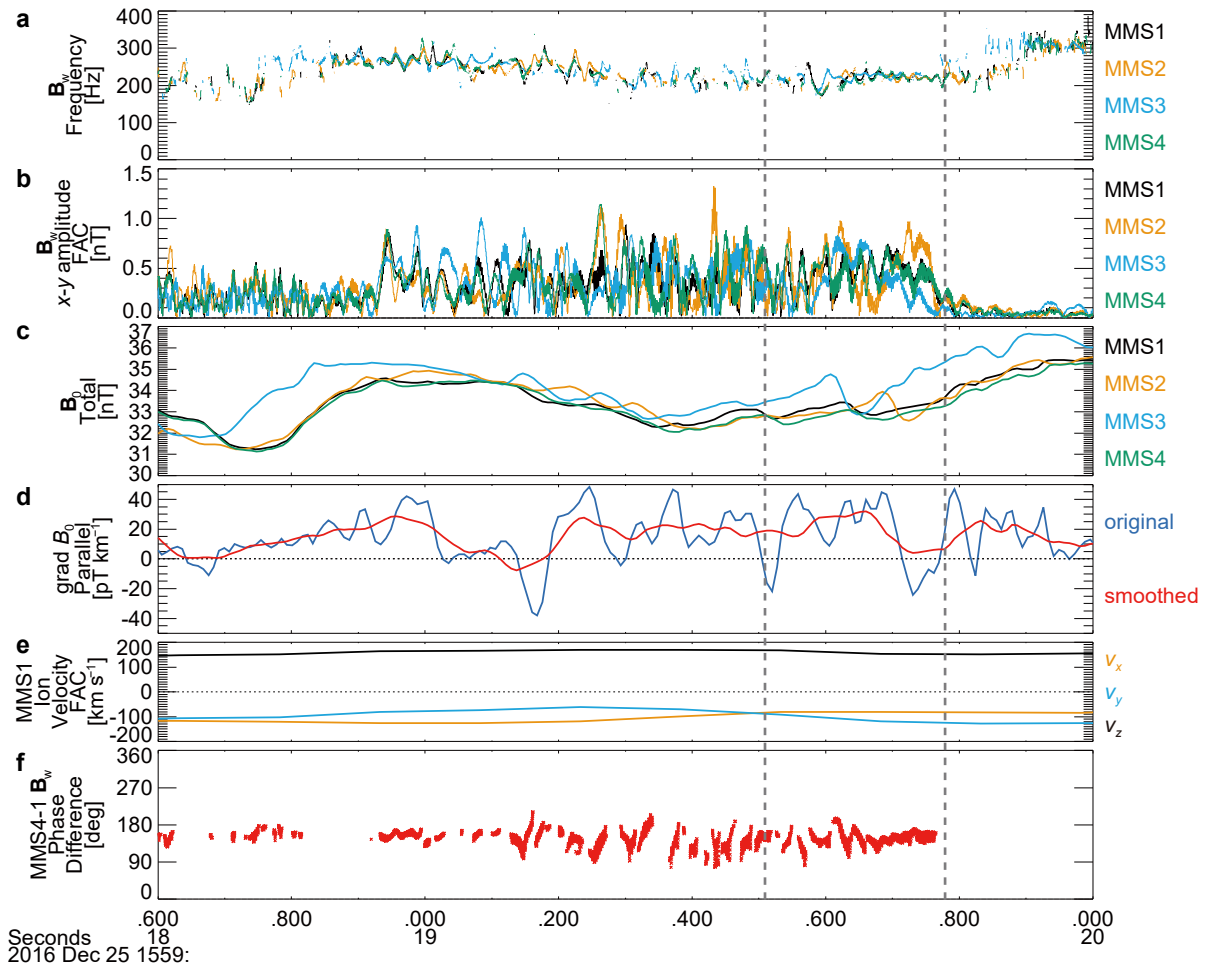

**Supplementary Fig. 2 | Details of the whistler-mode wave and gradient of the background magnetic field intensity (Event 1).** **a.** Wave frequency calculated using the waveform of  $\mathbf{B}_w$  (see Methods, subsection Calculation of wave frequency). **b.** Amplitude of  $\mathbf{B}_w$  in the plane perpendicular to the background magnetic field ( $x$ - $y$  plane in the field-aligned coordinate (FAC)). **c.** the background magnetic field intensity ( $B_0$ ). **d.** Gradient of  $B_0$  along the background magnetic field ( $\mathbf{B}_0$ ). Original  $B_0$  and 0.1-s moving-average  $B_0$  were used for blue and red curves, respectively. **e.** Ion bulk velocity in FAC (MMS1). **f.** Phase differences from MMS1 to MMS4 (closest pair in the direction perpendicular to  $\mathbf{B}_0$  (see Supplementary Fig. 1)). Vertical grey dashed lines indicate the interval used for Fig. 3.

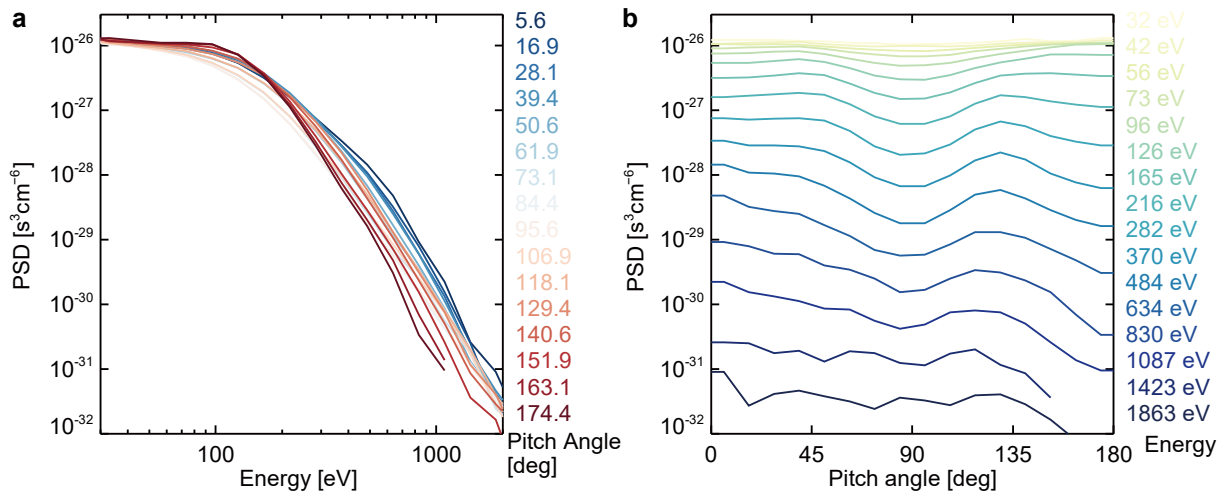

**Supplementary Fig. 3 | Details of electron velocity distribution function.** **a.** Energy spectra of electron phase space density (PSD) at various pitch angle (PA) bins. **b.** PA spectra of electron PSD at various energy bins. Electron data from 9 temporal bins (270 ms) around 15:59:19.644 UT (Fig. 3) from MMS1 were used. A gradient of PSD adequate for the initial linear growth of whistler-mode waves (increase toward PA of  $90^\circ$ ) is found only at PA larger than about  $130^\circ$  and the energy higher than about 200 eV.

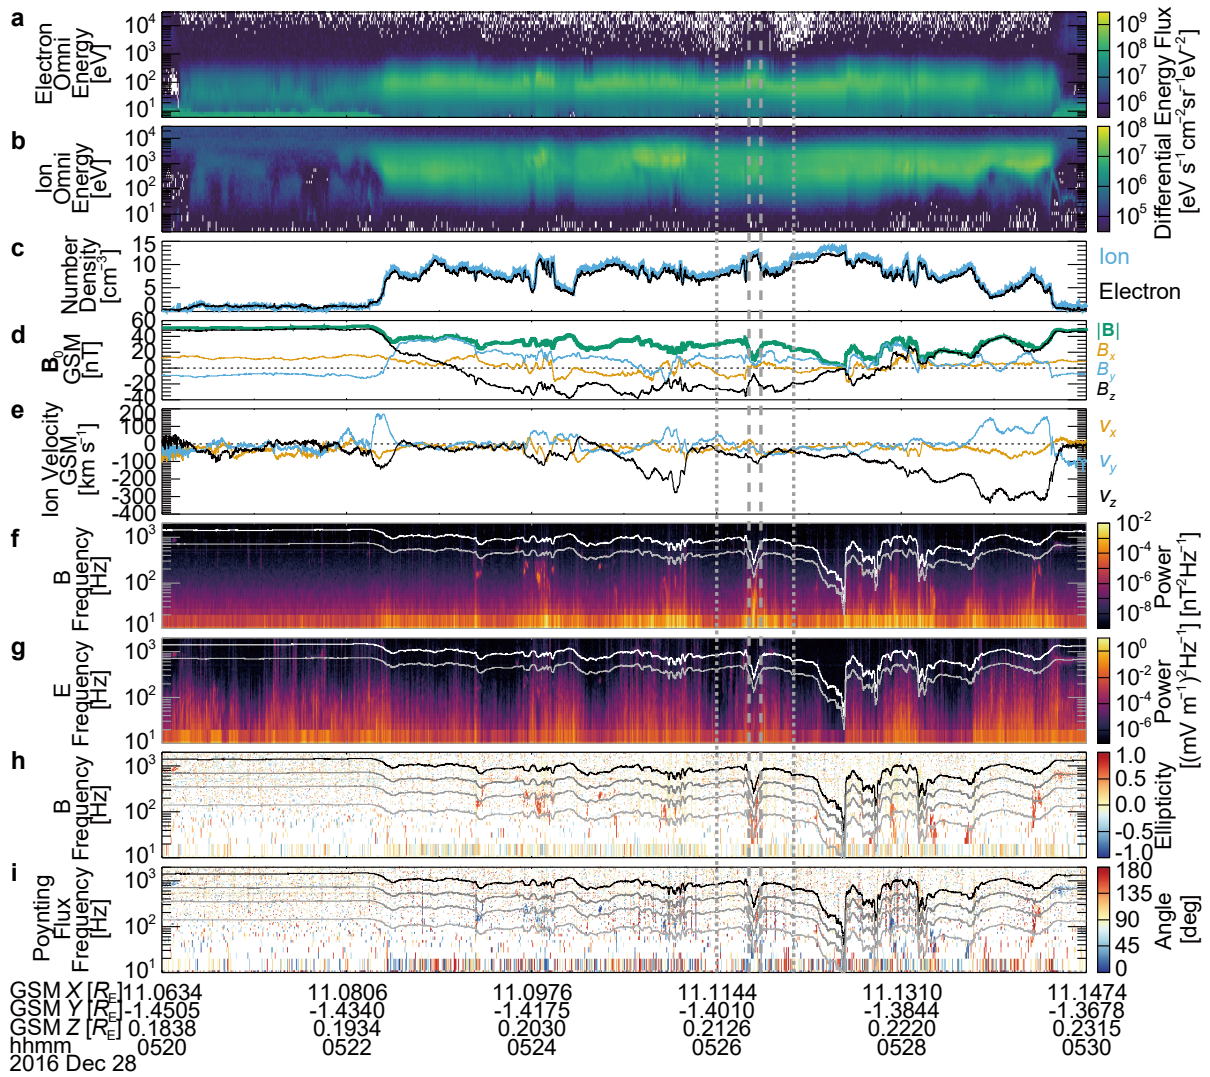

**Supplementary Fig. 4 | Long overview of MMS1 burst data (Event 2).** The format is the same as that of Fig. 1. Vertical gray dotted lines indicate the interval shown in Supplementary Fig. 5. Vertical gray dashed lines indicate the 8-s interval used for the detailed analysis.

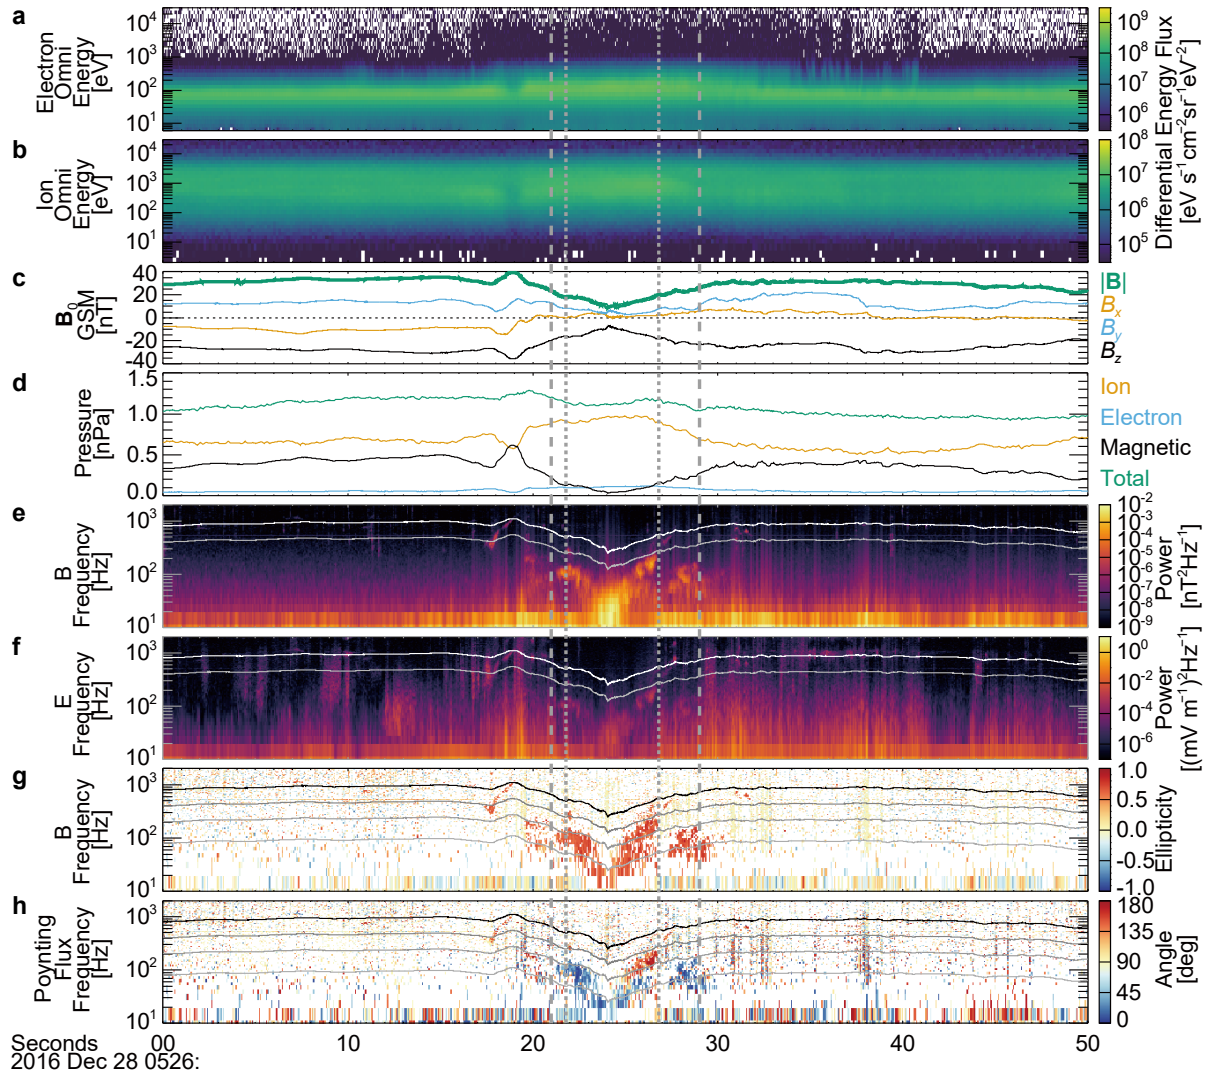

**Supplementary Fig. 5 | Short overview of MMS1 burst data (Event 2).** **a.** Omni-directional energy spectrum of electrons (photoelectrons were subtracted). **b.** Omni-directional energy spectrum of ions. **c.** the background magnetic field ( $\mathbf{B}_0$ ) in the geocentric solar magnetic (GSM) coordinates. **d.** Ion, electron, magnetic, and total pressures. In the trough of magnetic field intensity, the decrease in magnetic pressure was compensated with an increase in plasma (mainly ion) pressure. The format of **e–h**, which indicate property of the wave, is the same as that of Fig. 1f–i. Enhancements of electromagnetic right-hand polarized (positive ellipticity) waves corresponds to whistler-mode waves. Vertical grey dashed lines indicate the 8-s interval used for the detailed analysis. Vertical grey dotted lines indicate the interval shown in Fig. 6.

## MMS Formation

2016-12-28/05:26:23.68 UT

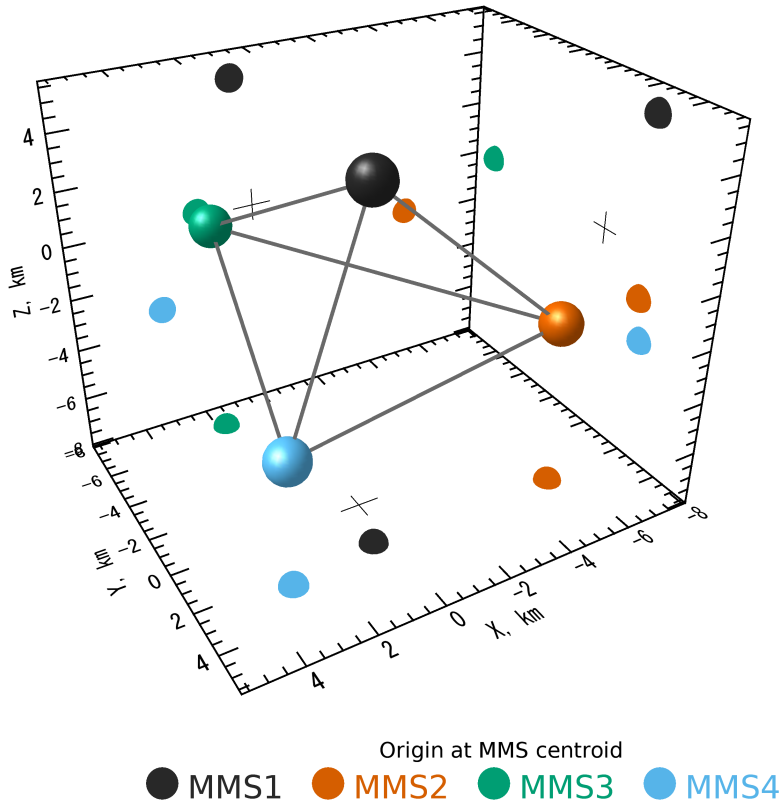

**Supplementary Fig. 6 | Formation of MMS spacecraft in the field-aligned coordinate system.** MMS1 and MMS4 are the closest pair in the direction perpendicular to the background magnetic field ( $\mathbf{B}_0$ ). The distance perpendicular to  $\mathbf{B}_0$  (about 3 km) was smaller than the gyro-radius (about 4.1 km) of the strongly nongyrotropic electrons (Background magnetic field intensity: 11.6 nT, Energy: about 500 eV, Pitch angle: about  $141^\circ$ ). The distance along  $\mathbf{B}_0$  was about 8 km, which was about 4.3 times smaller than the wavelength of the whistler-mode wave (about 34 km). The maximum separation (about 12 km) was much smaller than the gyro-radius of ions (about 175 km) with energy of 500 eV (ion temperature perpendicular to  $\mathbf{B}_0$ ).

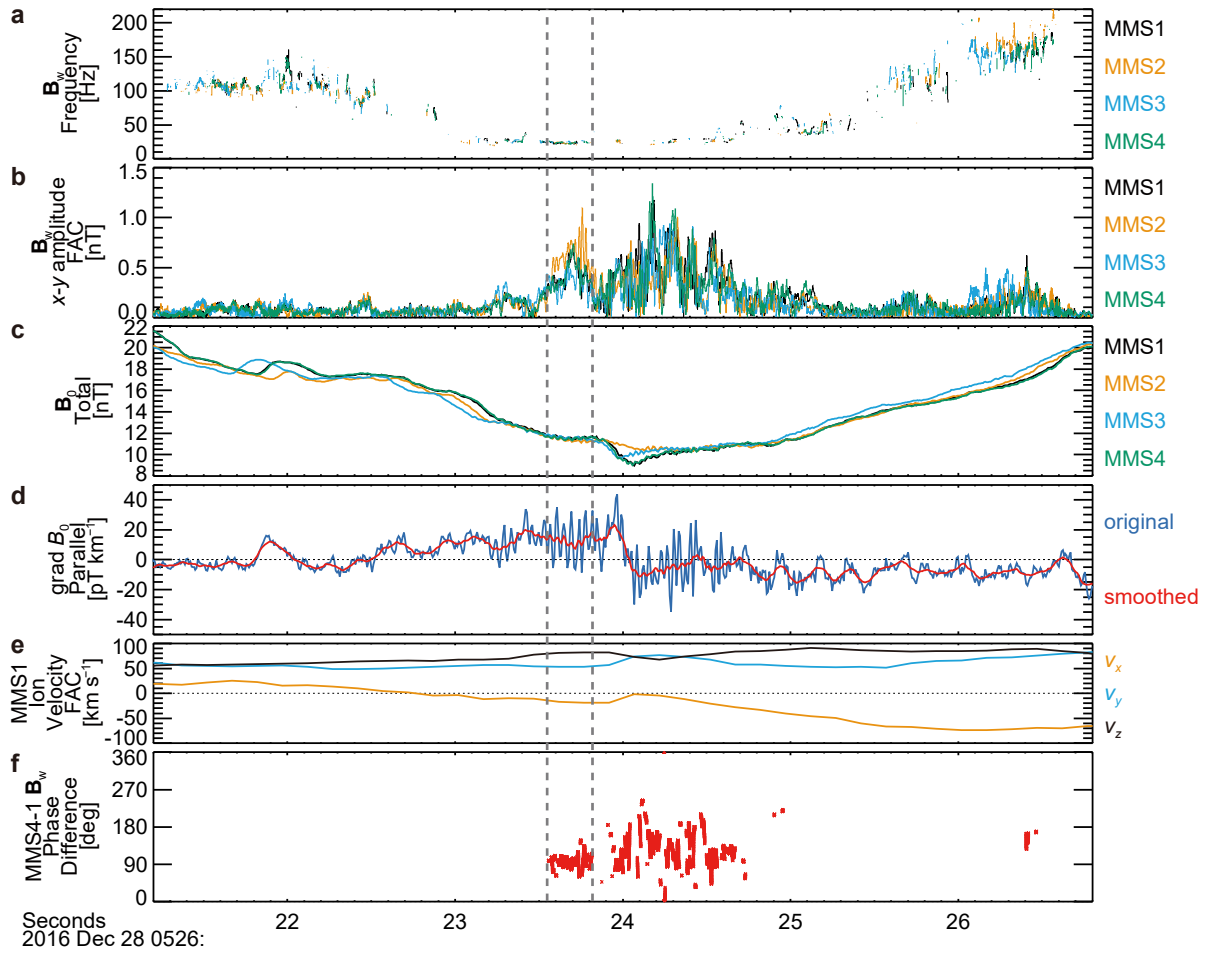

**Supplementary Fig. 7 | Details of the whistler-mode wave and gradient of  $B_0$  (Event 2).** The format is same as that for Supplementary Fig. 2. MMS1 and MMS4 was the closest pair in the direction perpendicular to the background magnetic field ( $B_0$ ) (see Supplementary Fig. 6). Vertical grey dashed lines indicate the interval used for Supplementary Fig. 8, 9.



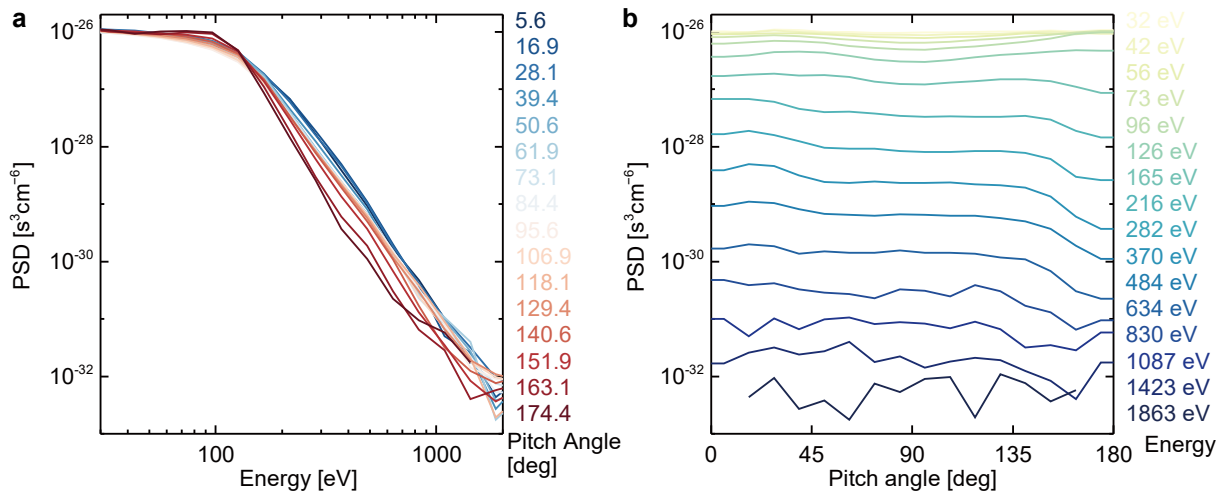

**Supplementary Fig. 8 | Details of electron velocity distribution function.** The format is same as that for Supplementary Fig. 3. Electron data from 9 temporal bins (270 ms) around 05:26:23.684 UT (Fig. 6) from MMS1 were used. A gradient of phase space density (PSD) adequate for the initial linear growth of whistler-mode waves (increase toward pitch angle (PA) of 90°) is found only at PA larger than about 140° and the energy higher than about 100 eV.

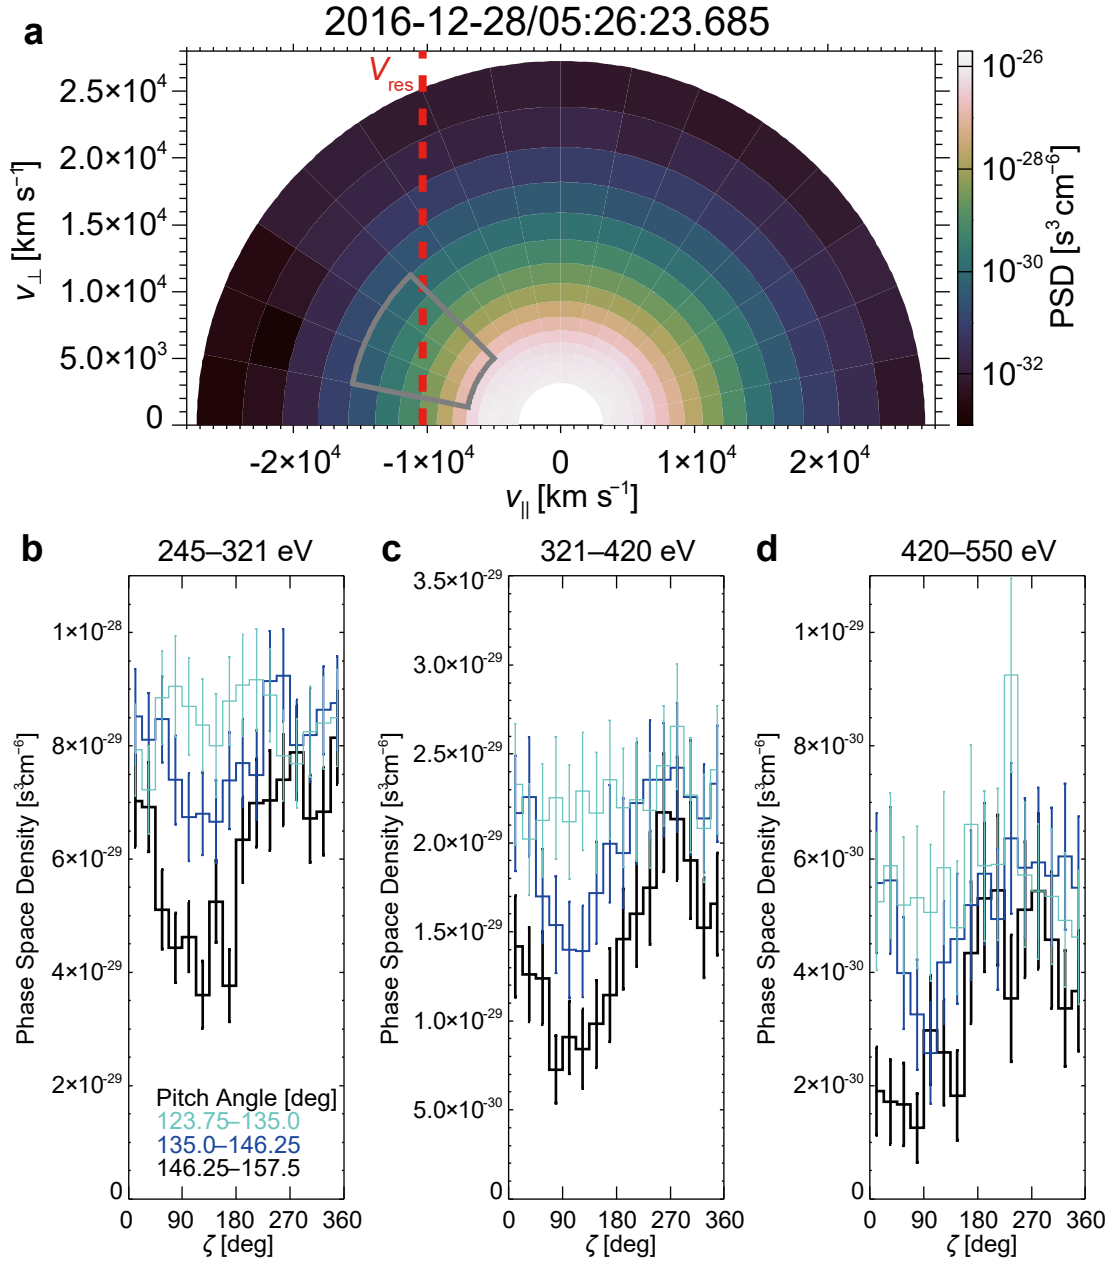

**Supplementary Fig. 9 | Electron velocity distribution function (Event 2).** **a.** Gyro-averaged electron velocity distribution function (28.3–2,112 eV) with the resonance velocity ( $V_{\text{res}}$ ) as a red dashed line. **b–d.** histograms of electron PSD in  $\zeta$  direction at 3 energy bins. The nongyrotropy exceeded  $2\sigma$  error bars (see Methods, subsection Electron and ion measurements by FPI) around  $V_{\text{res}}$ , while the electrons did not exhibit clear nongyrotropy around the pitch angle of about  $135^\circ$ . Electron data from 9 temporal bins (270 ms) around 05:26:23.684 UT (Fig. 6) from each spacecraft were used (see Methods, subsection Electron and ion measurements by FPI). The fan-shaped area surrounded by a gray curve indicate the pitch angle and energy ranges for the calculation of the resonant current ( $J_{\text{res}}$ ) for Event 2.
